# Supplementary material for: Sex and SP-A2 Dependent NAD(H) Redox Alterations in Mouse Alveolar Macrophages in Response to Ozone Exposure: Potential Implications for COVID-19
Source: PubMed Central journal article supplement (PMC7601279; doi:10.3390/antiox9100915), 2020-09-25
Supplement: antioxidants-09-00915-s001.pdf [file antioxidants-09-00915-s001.pdf]

## Supplementary Materials

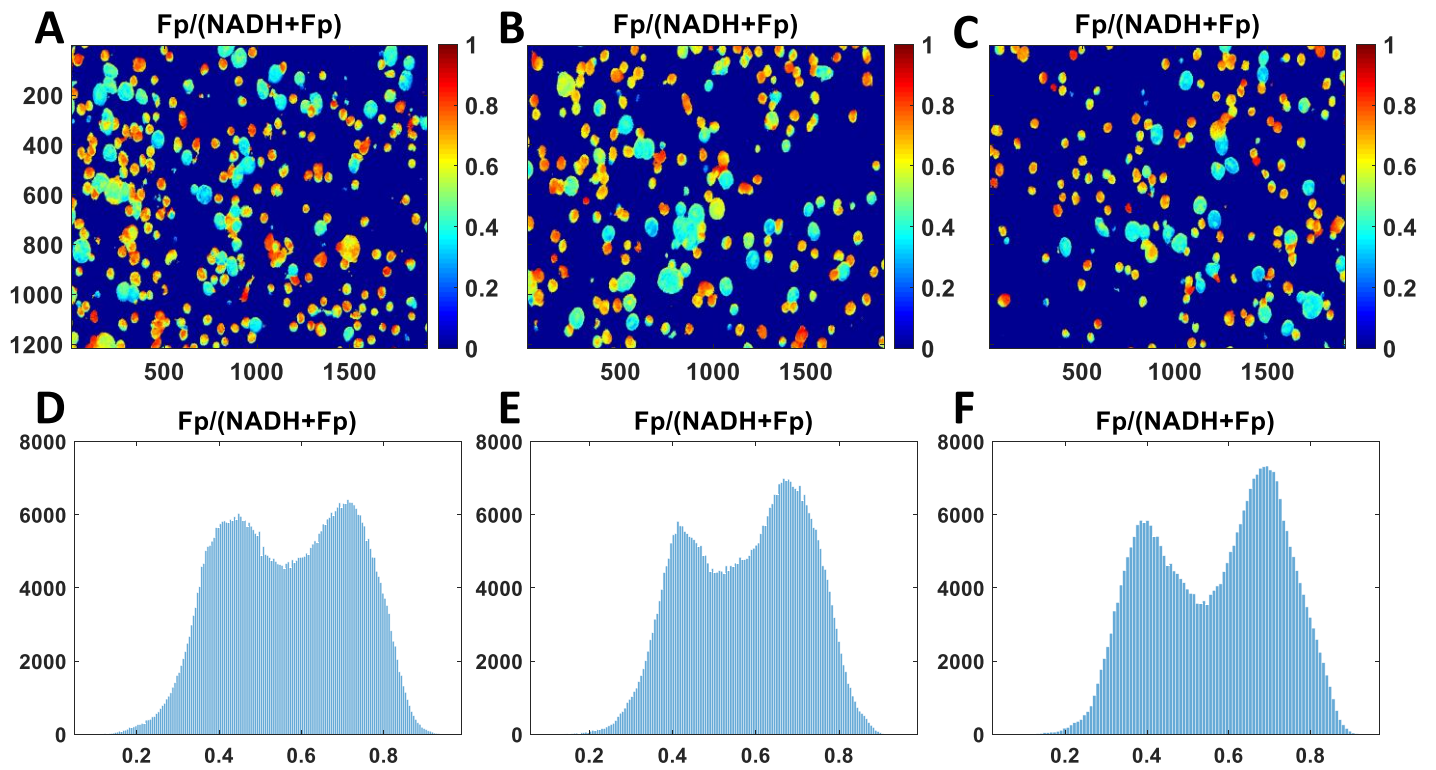

**Figure 1S.** ORI-detected AM redox heterogeneity within a male KO mouse with prior ozone exposure shows a bimodal redox state. (A)-(C) Typical redox ratio images displaying two distinct redox subpopulations readily discerned by their pseudo-colors and their corresponding histograms (D)-(F).

**Table S1. The mean redox indices of AM from the studied mice exposed to filtered air (FA, as control group) or Ozone (O<sub>3</sub>)**

| <b>SP-A2 mice</b>          | <b>Mouse ID</b> | <b>Exposure</b> | <b>Gender</b> | <b>Fp</b> | <b>NADH</b> | <b>Fp/(NADH+Fp)</b> |
|----------------------------|-----------------|-----------------|---------------|-----------|-------------|---------------------|
| SP-A2 (M, FA)              | 10661           | FA              | M             | 1239      | 754         | 0.574               |
| SP-A2 (M, FA)              | 10662           | FA              | M             | 1148      | 700         | 0.565               |
| SP-A2 (M, FA)              | 10665           | FA              | M             | 1142      | 699         | 0.564               |
| SP-A2 (F, FA)              | 10634           | FA              | F             | 922       | 616         | 0.552               |
| SP-A2 (F, FA)              | 10635           | FA              | F             | 989       | 730         | 0.526               |
| SP-A2 (F, FA)              | 10655           | FA              | F             | 1000      | 710         | 0.529               |
| SP-A2 (M, O <sub>3</sub> ) | 10739           | O <sub>3</sub>  | M             | 1226      | 569         | 0.652               |
| SP-A2 (M, O <sub>3</sub> ) | 10743           | O <sub>3</sub>  | M             | 1376      | 589         | 0.652               |
| SP-A2 (M, O <sub>3</sub> ) | 10744           | O <sub>3</sub>  | M             | 1433      | 608         | 0.650               |
| SP-A2 (M, O <sub>3</sub> ) | 10754           | O <sub>3</sub>  | M             | 1368      | 609         | 0.646               |
| SP-A2 (M, O <sub>3</sub> ) | 10755           | O <sub>3</sub>  | M             | 1116      | 581         | 0.596               |
| SP-A2 (F, O <sub>3</sub> ) | 10736           | O <sub>3</sub>  | F             | 1026      | 605         | 0.574               |
| SP-A2 (F, O <sub>3</sub> ) | 10737           | O <sub>3</sub>  | F             | 1101      | 657         | 0.564               |
| SP-A2 (F, O <sub>3</sub> ) | 10741           | O <sub>3</sub>  | F             | 1099      | 590         | 0.591               |
| SP-A2 (F, O <sub>3</sub> ) | 10742           | O <sub>3</sub>  | F             | 1374      | 680         | 0.612               |

| <b>KO mice</b>           | <b>Mouse ID</b> | <b>Exposure</b> | <b>Gender</b> | <b>Fp</b> | <b>NADH</b> | <b>Fp/(NADH+Fp)</b> |
|--------------------------|-----------------|-----------------|---------------|-----------|-------------|---------------------|
| KO (M, FA)               | 10731           | FA              | M             | 905       | 592         | 0.567               |
| KO (M, FA)               | 10733           | FA              | M             | 864       | 498         | 0.584               |
| KO (M, FA)               | 12281           | FA              | M             | 1031      | 562         | 0.593               |
| KO (M, FA)               | 13638           | FA              | M             | 944       | 619         | 0.558               |
| KO (F, FA)               | 12277           | FA              | F             | 928       | 672         | 0.524               |
| KO (F, FA)               | 12279           | FA              | F             | 1103      | 604         | 0.594               |
| KO (F, FA)               | 12287           | FA              | F             | 898       | 538         | 0.577               |
| KO (M, O <sub>3</sub> )  | 10722           | O <sub>3</sub>  | M             | 2358      | 757         | 0.717               |
| KO (M, O <sub>3</sub> )  | 10723           | O <sub>3</sub>  | M             | 1928      | 712         | 0.687               |
| KO (M, O <sub>3</sub> )  | 12272           | O <sub>3</sub>  | M             | 1470      | 601         | 0.666               |
| KO (M, O <sub>3</sub> )  | 13633           | O <sub>3</sub>  | M             | 1715      | 684         | 0.669               |
| KO (F, O <sub>3</sub> )  | 12283           | O <sub>3</sub>  | F             | 1587      | 748         | 0.614               |
| KO (F, O <sub>3</sub> )  | 12284           | O <sub>3</sub>  | F             | 1189      | 571         | 0.621               |
| KO (F, O <sub>3</sub> )  | 12285           | O <sub>3</sub>  | F             | 1706      | 628         | 0.685               |
| KO (F, O <sub>3</sub> )  | 12286           | O <sub>3</sub>  | F             | 1577      | 616         | 0.664               |
| *KO (M, O <sub>3</sub> ) | 12273           | O <sub>3</sub>  | M             | 1358      | 956         | 0.564               |
| * An outlier             |                 |                 |               |           |             |                     |
